# Supplementary figures and images for: Adopting and sustaining a Virtual Fracture Clinic model in the District Hospital setting – a quality improvement approach
Source: PubMed Central journal article supplement — BMJ Qual Improv Rep. 2017 Feb 6;6(1):u220211.w7861. doi: 10.1136/bmjquality.u220211.w7861 (PMC5306683; doi:10.1136/bmjquality.u220211.w7861), 2017-02-06

# New patient referrals to the Fracture Clinic

Data collection point 1

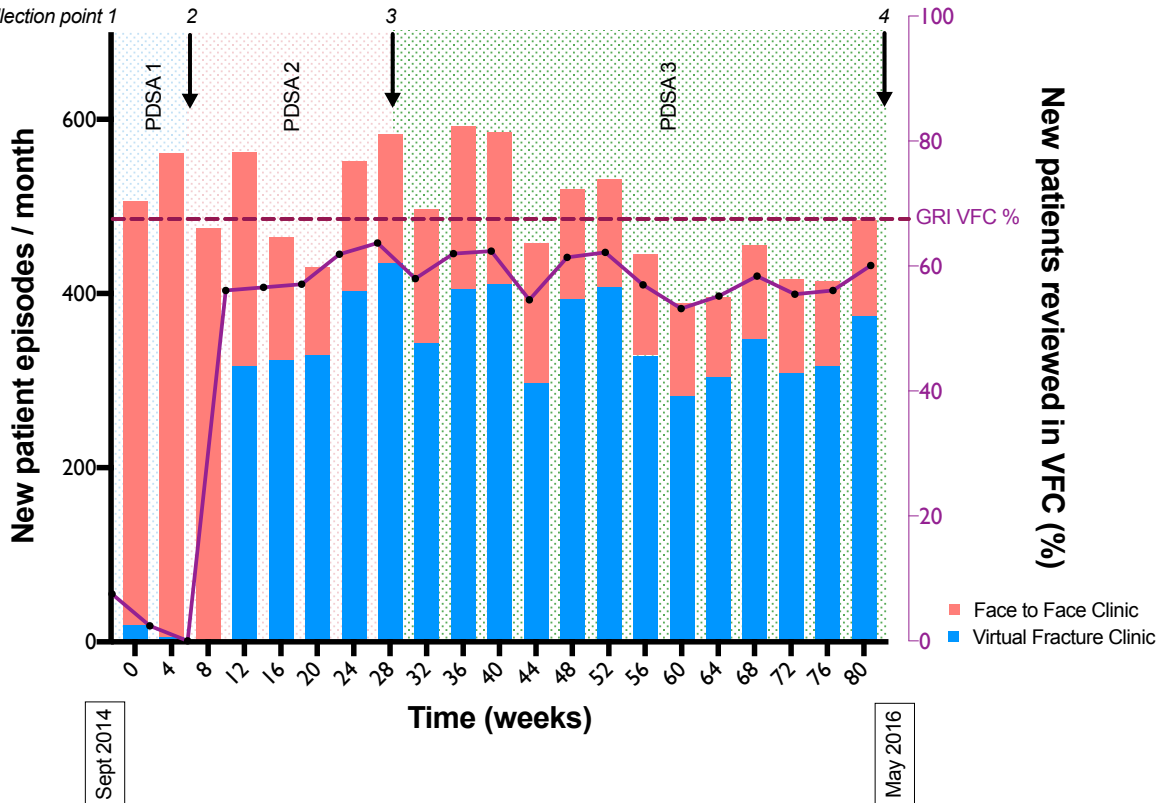

Supplement: bmjqir.u220211.w7861supp.pdf [file bmjqir.u220211.w7861supp.pdf]
